# Supplementary material for: Peripheral blood methylation profiling of female Crohn’s disease patients
Source: PubMed Central journal article supplement (PMC4897922; doi:10.1186/s13148-016-0230-5), 2016-06-08

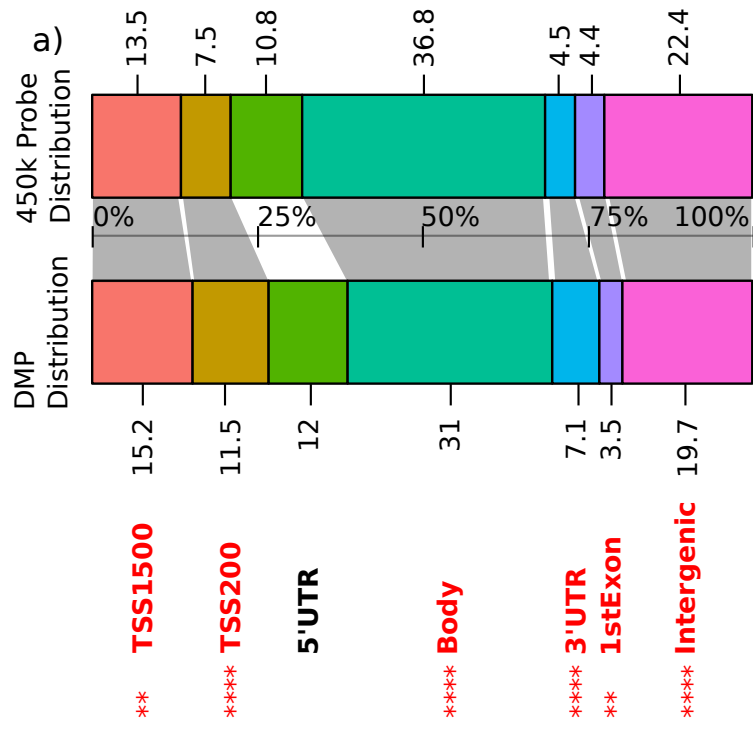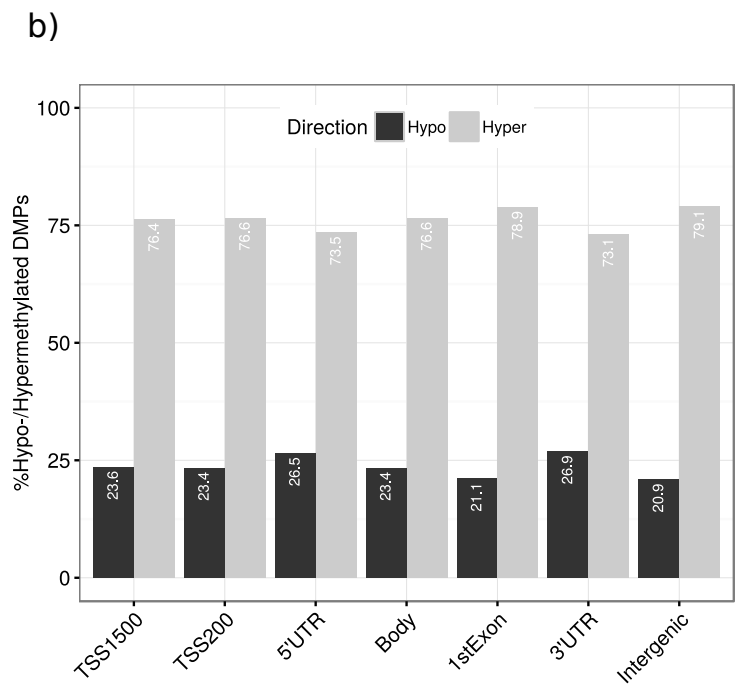

Supplement: 13148_2016_230_MOESM3_ESM.pdf [file 13148_2016_230_MOESM3_ESM.pdf]
