# Supplementary material for: Peripheral blood methylation profiling of female Crohn’s disease patients
Source: PubMed Central journal article supplement (PMC4897922; doi:10.1186/s13148-016-0230-5), 2016-06-08

a)

## HLA-J

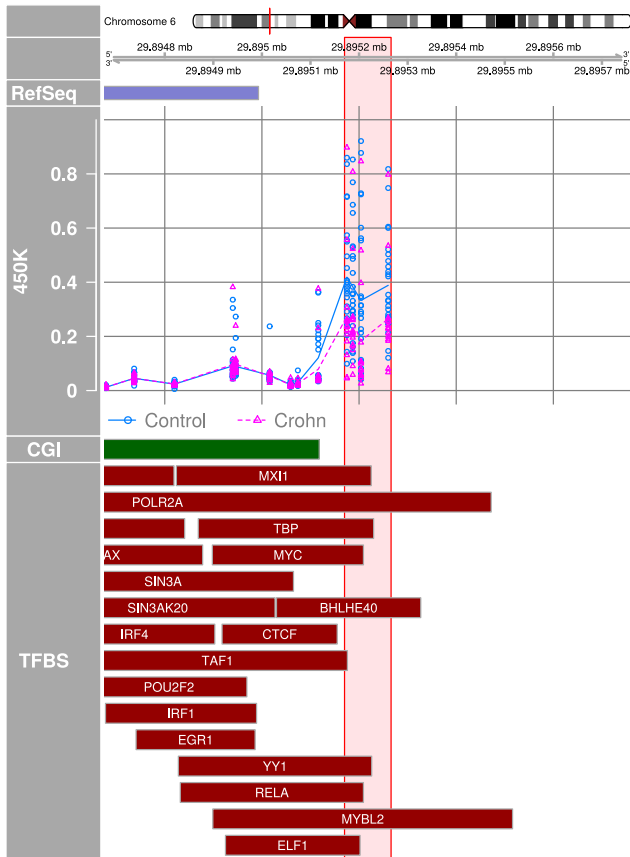

b)

## MOV10L1

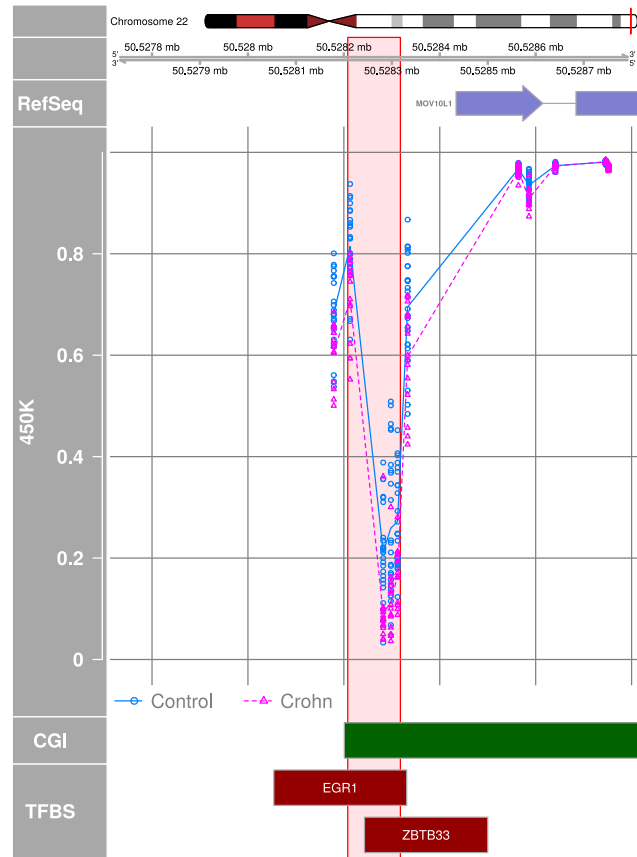

c)

## LINC00612

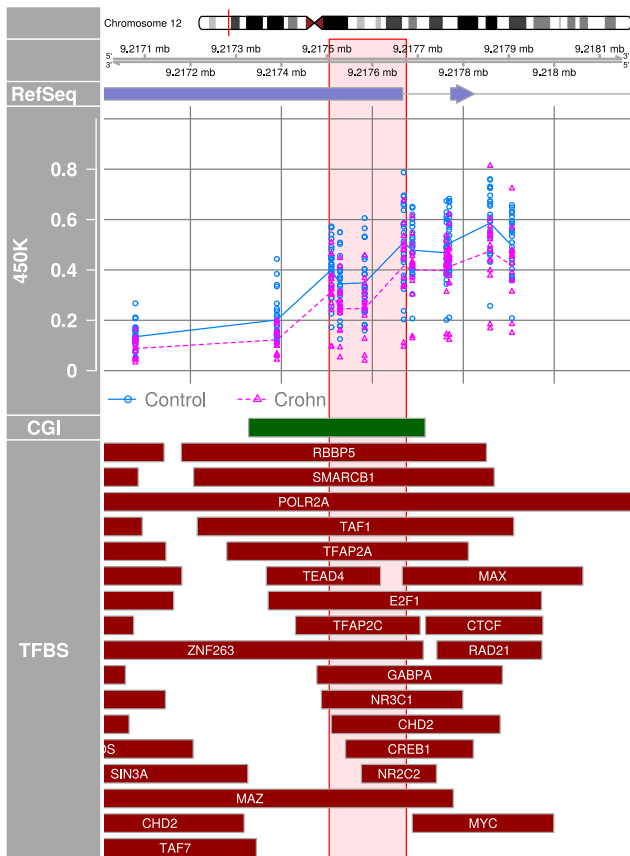

d)

## SHANK2

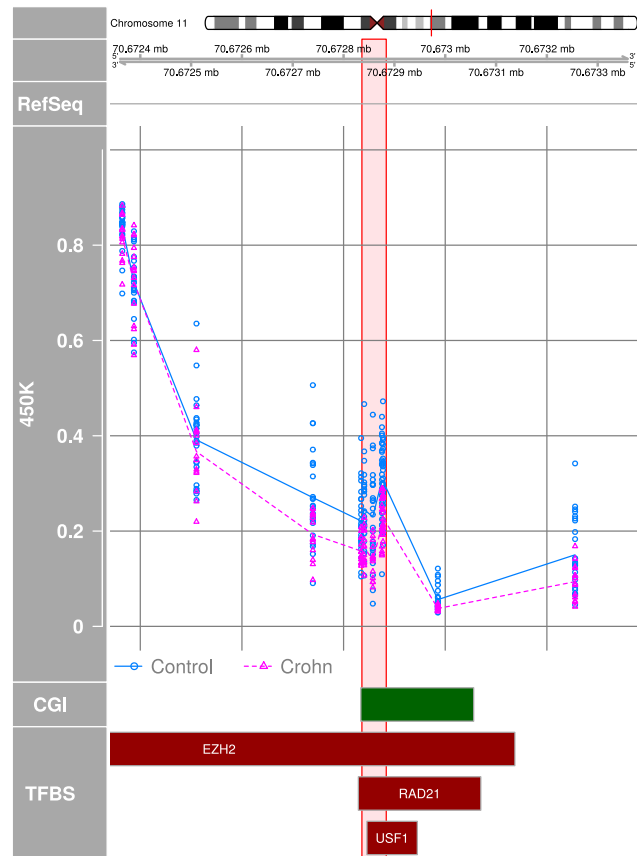

e)

## APOBEC1

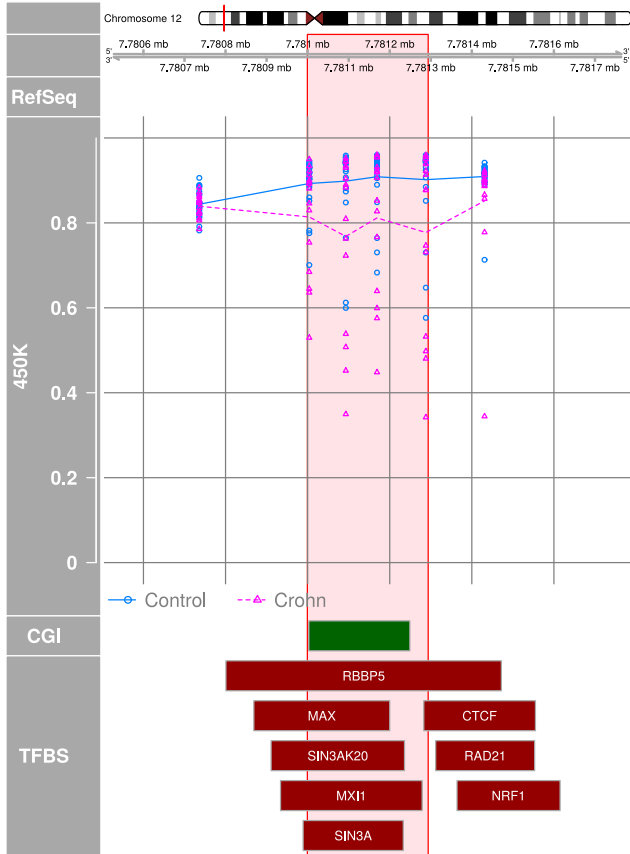

f)

## BOLA3

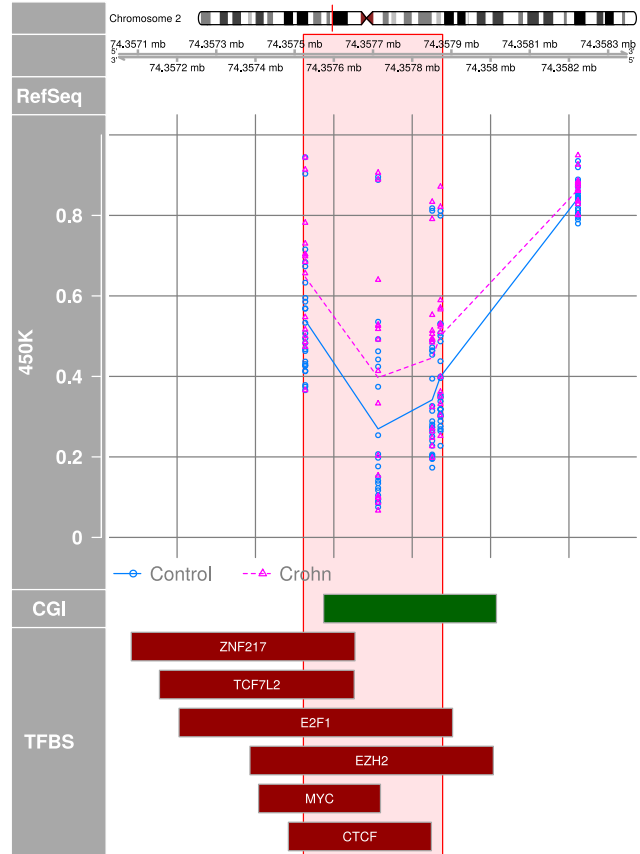

g)

## OR2L13

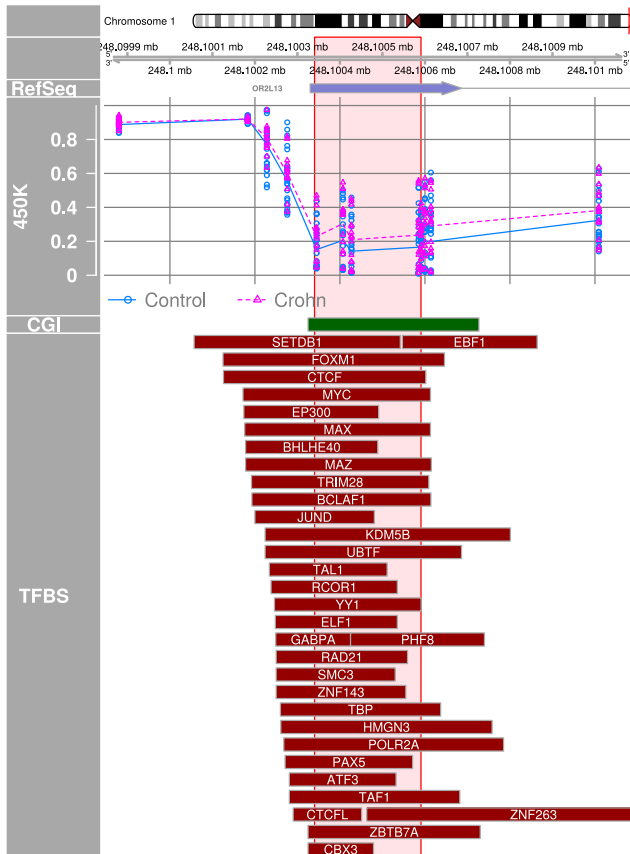

h)

## TACSTD2

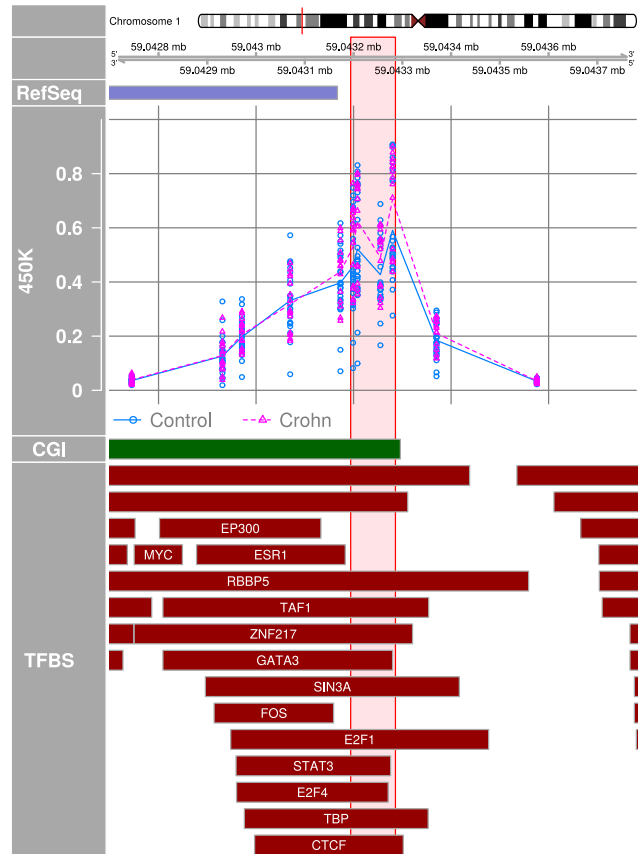

Supplement: 13148_2016_230_MOESM6_ESM.pdf [file 13148_2016_230_MOESM6_ESM.pdf]
